# Supplementary material for: Bistable perception alternates between internal and external modes of sensory processing
Source: PubMed Central journal article supplement — iScience. 2021 Feb 26;24(3):102234. doi: 10.1016/j.isci.2021.102234 (PMC7967014; doi:10.1016/j.isci.2021.102234), 2021-02-26
Supplement: mmc1.pdf [file mmc1.pdf]

**iScience, Volume 24**

**Supplemental information**

**Bistable perception alternates between internal  
and external modes of sensory processing**

**Veith Weinhhammer, Meera Chikermane, and Philipp Sterzer**

# Supplementary Information

"Blasts from the past: Bistable perception alternates between internal and external modes of sensory processing."

**Authors:**

Veith Weilhhammer<sup>1,2</sup>, Meera Chikermane<sup>1</sup>, Philipp Sterzer<sup>1,2,3,4</sup>

**Affiliations and Contribution:**

<sup>1</sup> Department of Psychiatry, Charité-Universitätsmedizin Berlin, corporate member of Freie Universität Berlin and Humboldt-Universität zu Berlin, 10117 Berlin, Germany

<sup>2</sup> Berlin Institute of Health, Charité-Universitätsmedizin Berlin and Max Delbrück Center, 10178 Berlin, Germany

<sup>3</sup> Bernstein Center for Computational Neuroscience, Charité-Universitätsmedizin Berlin, 10117 Berlin, Germany

<sup>4</sup> Berlin School of Mind and Brain, Humboldt-Universität zu Berlin, 10099 Berlin, Germany

**Corresponding Author:**

Veith Weilhhammer, Department of Psychiatry, Charité Campus Mitte, Charitéplatz 1, 10117 Berlin, phone: 0049 (0)30 450 517 317, email: veith-andreas.weilhhammer@charite.de

**Word Count:** 3415 words (main text without methods)

**OSF-Project:** <https://osf.io/y2cfm/>

# 1 Transparent Methods

## 2 1.1 Participants

3 We recruited a total of 20 participants (9 female; age:  $27.45 \pm 1.01$  years). All participants  
4 had (corrected-to-) normal vision, were naive to the purpose of the study and gave informed,  
5 written consent prior to the experiment authorized by the Charité ethics committee.

## 6 1.2 Apparatus

7 Stimuli were presented on a 98PDF-CRT-Monitor (60 Hz, 1040 x 1050 pixels, 60 cm viewing  
8 distance, 41.38 pixels per degree [ $^{\circ}$ ] visual angle) using Psychtoolbox 3 and Matlab R2007b  
9 (MathWorks). 3D stimulation was achieved using 3D red-blue filter glasses. The blue filter  
10 was placed over the right eye.

## 11 1.3 Heterochromatic Flicker Photometry

12 Subjective differences in luminance can induce 3D effects based on the Pulfrich effect. To  
13 preclude that this phenomenon induces biases with regard to direction of rotation in partially  
14 ambiguous structure-from-motion stimuli, we conducted a separate pre-test experiment. We  
15 used *Heterochromatic Flicker Photometry* to estimate subjective equiluminance between red  
16 and blue. We presented red and blue circles (diameter:  $6.45^{\circ}$  visual angle) alternating at a  
17 frequency of 15 Hz. In case of subjective differences in luminance, participants perceived a  
18 flicker, which they reduced by adjusting the luminance of the blue stimulus initially presented  
19 at a random luminance between 0 and 125% relative to the red stimulus presented at a  
20 fixed luminance of 100%. Average equiluminance estimated across 10 such trials determined  
21 the monitor- and participant-specific luminance of the red- and blue-channels (average blue

22 luminance:  $110.85 \pm 4.74\%$ ).

## 23 1.4 Main experiment

24 The main experiment assessed how perceptual history was integrated with varying levels of  
25 disambiguating sensory information. To induce bistable perception, we generated rotating  
26 discontinuous structure-from-motion stimuli by placing a total of 2000 dots (each subtending  
27  $0.08^\circ$  visual angle, overall stimulus size:  $14.5^\circ \times 14.5^\circ$ ) on the surface of a Lissajous band (see  
28 Figure 1A and additional Supplementary Video V1). The Lissajous band was formed by the  
29 perpendicular intersection of two sinusoids ( $x(t) = \sin(A * t)$  and  $y(t) = \cos(B * t + \delta)$  with  
30  $A = 3$ ,  $B = 8$ ). Within each trial, the stimulus was presented for 2 sec, while  $\delta$  increased  
31 from 0 to  $0.5\pi$ . The width of the Lissajous band was set to  $0.04\pi$  ° rotational angle. Fixation  
32 intervals between trials were uniformly jittered around  $2.5 \pm 0.25$  sec.

33 To generate parametric 3D stimuli, we attached a stereo-disparity signal to a fraction of the  
34 dots on the Lissajous band. Dots that carried stereo-disparity information were represented  
35 on separate monocular channels. To this end, corresponding pairs of red (left eye) and blue  
36 (right eye) dots were shifted against each other by  $0.01\pi$  rotational angle. Dots without stereo-  
37 disparity information were presented binocularly. The wavelength of binocular dots (purple)  
38 was defined by adding the individual wavelengths of red and blue (see Heterochromatic Flicker  
39 Photometry). Throughout the experiment, we varied the signal-to-ambiguity ratio (SAR)  
40 by manipulating the fraction of dots that carried stereo-disparity information (see below).  
41 The direction of disambiguating sensory information (i.e., whether the front surface of the  
42 partially disambiguated sphere moved to the left or to the right) was randomized across trials.

43 We instructed participants to indicate the perceived direction of rotation of the Lissajous  
44 band by pressing the arrow-keys on a standard keyboard (right index finger: rotation of the  
45 front surface of the Lissajous to the *left*; right ring finger: rotation to the *right*; middle finger:  
46 *unclear* or mixed direction of rotation). *Error* responses were defined for trials at which

47 participants did not respond before the end of stimulus presentation or indicated more than  
48 one perceptual response.

49 Within one run, participants viewed a total of 120 trials. In runs R1-4, we adjusted the  
50 SAR dynamically based on a staircase procedure (Figure 1A; see Gekas et al. for a similar  
51 approach that manipulated the ambiguity of Gabor stimuli by parametrically varying their  
52 orientation (Gekas et al., 2019)). To this end, we defined *checkpoint-trials* that occurred  
53 in intervals of 10 trials, starting at the 11th trial of each run. At each checkpoint-trial, we  
54 computed the number of stimulus-congruent trials in the block of 10 trials preceding the  
55 checkpoint-trial. If more than 8 trials within the preceding block were stimulus-congruent (i.e.,  
56 perceived in congruence with disambiguating sensory information), we decreased the SAR for  
57 the upcoming block by 5%. For 8 stimulus-congruent trials, the SAR remained unchanged in  
58 the upcoming block. If we observed less than 8 and more than 5 stimulus-congruent trials, we  
59 increased the SAR by 5% in the upcoming block. For less than 6 stimulus-congruent trials,  
60 we increased the SAR by 10% in the upcoming block. Run R1 started at an initial SAR of  
61 100%. Runs R2-4 started at the final SAR obtained in the preceding run. During the final  
62 runs R5 and R6, we fixed the SAR to the average SAR obtained during runs R1-4.

## 63 **1.5 Analyses**

64 As dependent variables-of-interest, we computed the proportion of stimulus-congruent trials  
65 (i.e., trials perceived in congruence with disambiguating sensory information) and history-  
66 congruent trials (i.e., trials perceived in congruence with the immediately preceding percept).  
67 At every trial, we recorded the specific perceptual response (left, right, unclear or error) and  
68 response time (difference between the button-press indicating the percept and trial onset).  
69 *Directed biases* in perception were assessed via the probability of trials perceived as rotating  
70 to the right (ranging from 0 to 100%). We computed *absolute biases* by taking the absolute  
71 difference between the probability of trials perceived as rotating to the right and chance level  
72 at 50%. For summary statistics, we computed the dependent variables within runs R1-6 or

73 for levels of SAR, respectively, and averaged across participants. For dynamic analyses, we  
74 computed the dependent variables at each trial within a sliding window of  $\pm 5$  trials. Trials  
75 were allocated to the *internal mode* of perceptual processing if the sliding probability of  
76 history-congruent percepts was above the sliding probability of stimulus-congruent percepts  
77 (vice versa for *external mode*). *Intermediate mode* was designed as a rest category accounting  
78 for the fraction of trials where the sliding probabilities of history- and stimulus-congruent  
79 percepts were equal (see Supplementary Figure 1C for a representative time course). In 6  
80 participants, we detected runs in which no mode-switch occurred. These runs were excluded  
81 when computing the average duration between mode-switches.

82 Statistical procedures were carried in *R* (summary statistics) and *Matlab* (computational  
83 modeling). We conducted group-level pair-wise comparisons using two-sided paired t-tests.  
84 Differences from chance-level were evaluated using two-sided one-sample t-tests. We performed  
85 correlative analyses using Pearson correlation. We applied the R-method *glm* with a binomial  
86 link-function for logistic regression and used the R-packages *lmer* and *afex* for linear mixed  
87 effects modeling.

88 Bayes factors were computed using the R-package *BayesFactor*, using the function *ttestBF*  
89 and *lmBF* for linear models. For t-tests, we placed a noninformative Jeffreys prior on the  
90 variance of the normal population and a Cauchy prior ( $\text{rscale} = 0.71$ ) on the standardized  
91 effect size. Linear models used g-priors (fixed effects:  $\text{rscale} = 0.71$ ; random effects = 1). To  
92 obtain Bayes factors for main effects and interactions, we estimated full and reduced models  
93 and divided the respective Bayes Factors.

### 94 **1.5.1 Logistic regression and simulation analyses**

95 In simulation analyses, we asked whether logistic regression reproduced the overall probability  
96 of stimulus- and history-congruent percepts. Moreover, we used these simulations to test  
97 whether the Markovian assumption of logistic regression (i.e., that the percept at trial  $t$   
98 depends exclusively on the current sensory information at trial  $t$  and the percept at the

99 immediately preceding trial  $t-1$ ) could explain the observed fluctuations between external  
100 and internal modes of perceptual processing. Prior to simulation analysis, we estimated  
101 logistic regression models that predicted the perceptual response  $p$  at each trial  $t$  based the  
102 dependent variables  $h$  (perceptual history) and  $d$  (disambiguating sensory information):

$$p(t) = \beta_h * h(t) + \beta_d * d(t) \quad (1)$$

103 The dependent variable *perceptual history* ( $h(t)$ ) was defined by the perceptual response  $p(t)$   
104 (0: leftward rotation; 1: rightward rotation) at the preceding trial:

$$h(t) = p(t - 1) \quad (2)$$

105 The dependent variable *Disambiguating sensory information* ( $d(t)$ ) was defined by a linear  
106 transform of the *Direction of disambiguation* ( $DIR$ , 0: leftward rotation; 1: rightward rotation)  
107 and the signal-to-ambiguity ratio ( $SAR$ , ranging from 0 to 100%) at trial  $t$ :

$$d(t) = 0.5 + (DIR(t) - 0.5) * SAR/100 \quad (3)$$

108 By setting either  $\beta_h$  or  $\beta_d$  to zero, we created reduced logistic regression models that were  
109 compared based on Akaike Information Criterion (AIC). As indicated by equation (1), none  
110 of the logistic regression models contained an interaction term. For simulation, we used the  
111 full logistic regression model, with  $SAR$  set to the individual threshold  $SAR$  used in run  
112 R5 and 6.  $DIR$  was chosen at random for every simulated trial. In analogy to the actual  
113 experiment, we simulated 120 trials per run. The total number of simulated runs amounted  
114 to 1000 for each participant.

115 **1.5.2 Computational modeling**

116 We constructed all models using the Hierarchical Gaussian Filter toolbox (Mathys et al.,  
 117 2014) as implemented in the HGF 4.0 toolbox (distributed within the TAPAS toolbox;  
 118 <https://www.tnu.ethz.ch/de/software/tapas>). At each trial  $t$ , the possible perceptual states  
 119  $y$  were coded as

$$y(t) = \begin{cases} 1 : & \rightarrow \text{ (rotation) } \\ 0 : & \leftarrow \text{ (rotation) } \end{cases} \quad (4)$$

120 The input to the model  $u$  was provided a linear combination of the direction of disambiguation  
 121 (DIR) and the signal-to-ambiguity ratio (SAR):

$$u(t) = 0.5 + (DIR(t) - 0.5) * SAR/100 \quad (5)$$

122 To predict the participants' trial-wise perceptual responses, we combined input  $u$  with the  
 123 prior probability of the perceptual states  $\hat{\mu}_1(t)$  into the first-level posterior  $\mu_1$ .

$$\eta_1(t) = \exp(-(u(t) - 1)^2 / (2 * \alpha)) \quad (6)$$

$$\eta_0(t) = \exp(-(u(t))^2 / (2 * \alpha)) \quad (7)$$

$$\mu_1(t) = \frac{\hat{\mu}_1(t) * \eta_1(t)}{\hat{\mu}_1(t) * \eta_1(t) + (1 - \hat{\mu}_1(t)) * \eta_0(t)} \quad (8)$$

124 In these equations, the influence of disambiguating sensory information on perception scales  
 125 with the sensitivity parameter  $\alpha$ , which was estimated as a free parameter in all models.  
 126 When  $\alpha$  approaches zero,  $\mu_1(t)$  is close to the binary values of  $u(t)$  (i.e., 0: stimulation with



127 3D-information for leftward rotation; 1: rightward rotation), signaling high sensitivity to  
 128 sensory information. Conversely, for  $\alpha$  increasing toward infinity,  $\mu_1(t)$  is close to  $\hat{\mu}_1(t)$  (see  
 129 below), reflecting low sensitivity to sensory information.

130 The influence of perceptual history, in turn, is represented by  $\hat{\mu}_1(t)$ . The value of  $\hat{\mu}_1(t)$  depends  
 131 on the dynamic accumulation of history effects in  $\mu_2$  (i.e, the estimated prior probability of  
 132 perceptual states represented at the second level of the HFG), which represents the tendency  
 133 of the first level posterior towards  $\mu_1(t) = 1$ . For higher values of  $\kappa$ , the prior probability of  
 134 perceptual states  $\mu_2$  has a stronger impact on  $\hat{\mu}_1(t)$ . The influence of perceptual history on  
 135 the participants' experience therefore scales with  $\kappa$ :

$$\hat{\mu}_1(t) = s(\kappa * \mu_2(t - 1)) \quad (9)$$

136 Importantly, the models considered in this manuscript differ with respect to the computation  
 137 of  $\mu_2$  (Dimension 1) and  $\kappa$  (Dimension 2).

### 138 1.5.2.1 Dimension 1

139 For models  $M_{Learning+/Oscillation-}$  and  $M_{Learning+/Oscillation+}$ ,  $\mu_2$  is updated via precision-  
 140 weighted prediction errors that are generated by the sequence of perceptual states:

$$\mu_2(t) = \hat{\mu}_2(t) + \frac{1}{\pi_2(t)} * \delta_1(t) \quad (10)$$

$$\hat{\mu}_2(t) = \mu_2(t - 1) \quad (11)$$

141 The precision of the second-level representation of perceptual history is governed by  $\pi_2(t)$

$$\pi_2(t) = \hat{\pi}_2(t) + \frac{1}{\hat{\pi}_1(t)} \quad (12)$$

142 The difference between the first level perceptual prediction  $\hat{\mu}_1(t)$  and the first-level posterior  
 143  $\mu_1(t)$  yields the prediction error  $\delta_1(t)$ :

$$\delta_1(t) = \mu(t) - \hat{\mu}_1(t) \quad (13)$$

144  $\delta_1(t)$  is combined with the second level precision  $\pi_2$ , yielding the precision-weighted prediction  
 145 error  $\epsilon_2(t)$ , which updates the second level prediction  $\hat{\mu}_2(t)$ :

$$\epsilon_2(t) = \frac{1}{\pi_2} * \delta_1(t) \quad (14)$$

146 In addition to  $\kappa$  and  $\alpha$ ,  $M_{Learning+/Oscillation+}$  and  $M_{Learning+/Oscillation-}$  incorporate a learning  
 147 rate  $\omega$ . This free parameter determines how swiftly  $\mu_2$  is updated in response to prediction  
 148 errors, thereby controlling the speed at which the second-level precision  $\hat{\pi}_2(t)$  changes over  
 149 time.

$$\hat{\pi}_1(t) = \frac{1}{\hat{\mu}_1(t) * (1 - \hat{\mu}_1(t))} \quad (15)$$

$$\hat{\pi}_2(t) = \frac{1}{\frac{1}{\pi_2(t)} + \exp(\omega_2)} \quad (16)$$

150 By contrast, for models  $M_{Learning-/Oscillation-}$  and  $M_{Learning-/Oscillating+}$ ,  $\mu_2(t)$  is defined by  
 151 the immediately preceding perceptual state:

$$\mu_2(t) = \begin{cases} 1 : & y(t) = 1 \\ -1 : & y(t) = 0 \end{cases} \quad (17)$$

152 Thus,  $M_{Learning-/Oscillation-}$  and  $M_{Learning-/Oscillating+}$  do not incorporate any second-level  
 153 accumulation of perceptual history and are thus governed only by the parameters  $\kappa$  and  $\alpha$ .

### 154 1.5.2.2 Dimension 2

155 For models  $M_{Learning-/Oscillation-}$  and  $M_{Learning+/Oscillating-}$ ,  $\kappa$  is estimated as a stable param-  
156 eter. By contrast, for models  $M_{Learning-/Oscillation+}$  and  $M_{Learning+/Oscillating+}$ ,  $\kappa$  fluctuates  
157 dynamically according to the frequency parameter  $f$  (in *nb trials*<sup>-1</sup>), the phase parameter  $p$   
158 and the amplitude parameter  $amp$

$$\kappa = \frac{(amp * \sin(f * t + p) + 1)}{2} \quad (18)$$

### 159 1.5.3 Model inversion

160 We used a free energy minimization approach for model inversion (Friston, 2010), maximizing a  
161 lower bound on the log-model evidence for the individual participants' data. Parameters were  
162 optimized using quasi-Newton Broyden-Fletcher-Goldfarb-Shanno minimization. Parameters  
163 were inverted using the following priors:

- 164 • Dimension 1:  $\kappa$  = prior mean of  $\log(1)$  and prior variance of 1;  $\alpha$  = prior mean of  
165  $\log(0.1)$  and prior variance of 1;  $\omega$  = prior mean of 0 and prior variance of 16.
- 166 • Dimension 2:  $\alpha$  = prior mean of  $\log(0.1)$  and prior variance of 1;  $f$  = prior mean of  
167  $\log(0.1)$  and prior variance of 0.1;  $p$  = prior mean of  $\pi/2$  and prior variance of  $\pi/2$ ;  $amp$   
168 = prior mean of  $\log(1)$  and prior variance of 1.

### 169 1.5.4 Model-level inference

170 Models were compared using random-effects Bayesian model selection (Stephan et al., 2009)  
171 as implemented in SPM12 (<http://www.fil.ion.ucl.ac.uk/spm/software/spm12>). We report  
172 protected exceedance probabilities for group-level inference and individual exceedance proba-  
173 bilities at the participant-level.

174 **2 Supplementary Figures**

175 **2.1 Supplementary Figure S1**

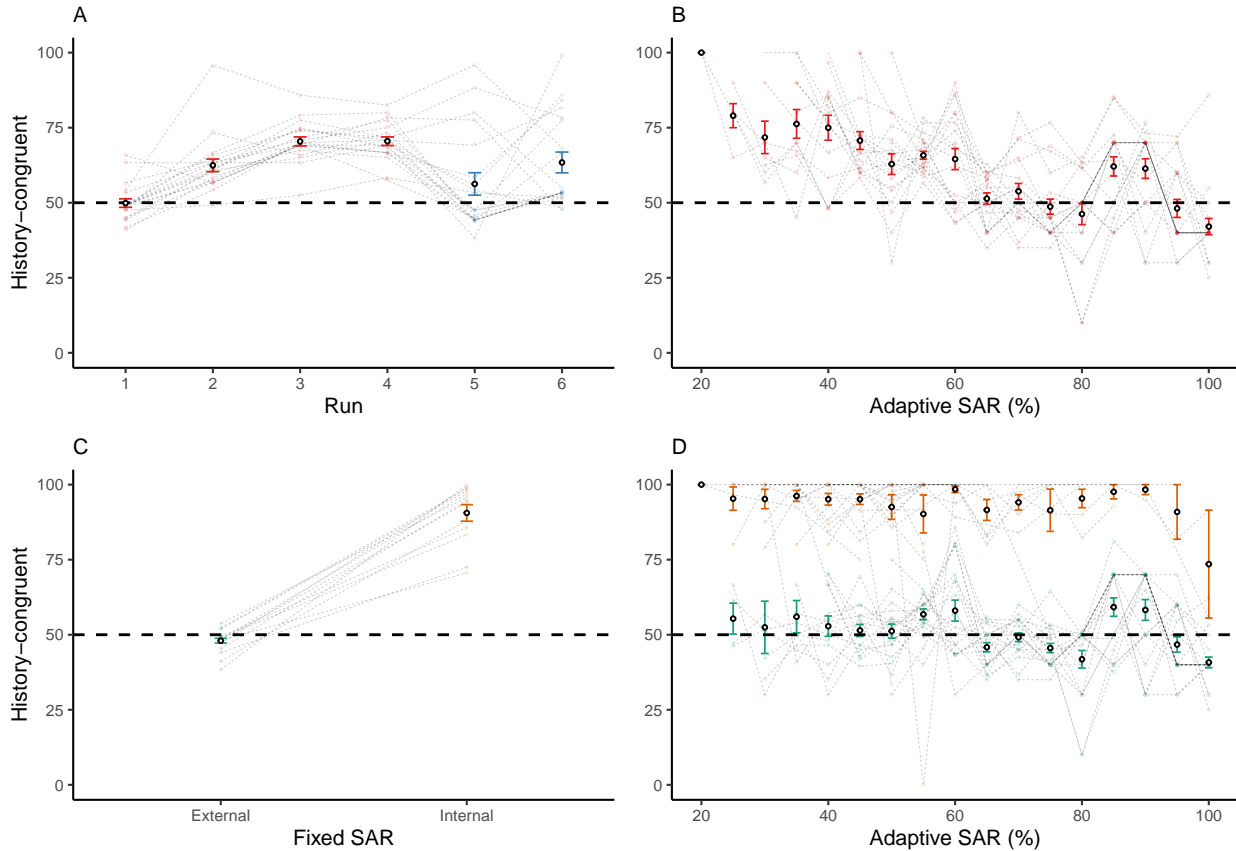

176

177 **Supplementary Figure S1. A. Perceptual history across runs. Related to Figure**  
 178 **1 and 2.** As the SAR was dynamically adjusted in runs R1-4 (shown in red), we observed  
 179 a progressive increase in the frequency of history-congruent percepts ( $F(3, 57) = 57.96$ ,  $p$   
 180  $= 2.58 \times 10^{-17}$ ,  $BF_{10} = 9.69 \times 10^{15}$ ; R1:  $49.88 \pm 1.41\%$ ; R2:  $62.46 \pm 2.1\%$ ; R3:  $70.42 \pm$   
 181  $1.5\%$ ; R4:  $70.5 \pm 1.43\%$ ). In runs with fixed SAR (R5-6, depicted in blue), history-congruent  
 182 percepts amounted to  $56.25 \pm 3.74\%$  in R5 and  $63.42 \pm 3.46\%$  in R6. **B. Perceptual**  
 183 **history across levels of SAR.** As expected, perceptual history had a stronger influence on  
 184 perception at lower levels of SAR ( $F(1, 265.07) = 181.5$ ,  $p = 7.25 \times 10^{-32}$ ,  $BF_{10} = 5.2 \times 10^{28}$ ,  
 185 main effect of *SAR*) and ranged at chance-level when disambiguating sensory information  
 186 was strong. **C. Perceptual history during internal and external mode for SARs at**

187 **threshold.** During internal mode, the frequency of history-congruent percepts approached  
188 100% ( $90.57 \pm 2.76\%$ ), but was reduced below chance level during external mode ( $48 \pm$   
189  $0.8\%$ ;  $T(19) = -2.51$ ,  $p = 0.02$ ,  $BF_{10} = 2.74$ , one-sample t-test). **D. History-congruent**  
190 **percepts during internal and external mode across the full range of SAR.** Linear  
191 mixed effects modeling indicated that frequency of history-congruent percepts was significantly  
192 affected by the factor *mode* (green: external; yellow: internal;  $F(2, 484.03) = 23.87$ ,  $p =$   
193  $1.3 \times 10^{-10}$ ,  $BF_{10} = 2.43 \times 10^{70}$ ) and showed a trend for an effect of *SAR* ( $F(1, 188.7) =$   
194  $3.42$ ,  $p = 0.07$ ,  $BF_{10} = 1.1$ ). We observed no between-factor interaction with respect to  
195 history-congruent percepts ( $F(2, 469.91) = 0.07$ ,  $p = 0.93$ ,  $BF_{10} = 0.05$ ). Please note that  
196 any main effect of *mode* was expected, since external and internal mode were defined based  
197 on the dynamic probability of stimulus-congruence. Pooled data are represented as mean  $\pm$   
198 SEM.

199 **2.2 Supplementary Figure S2**

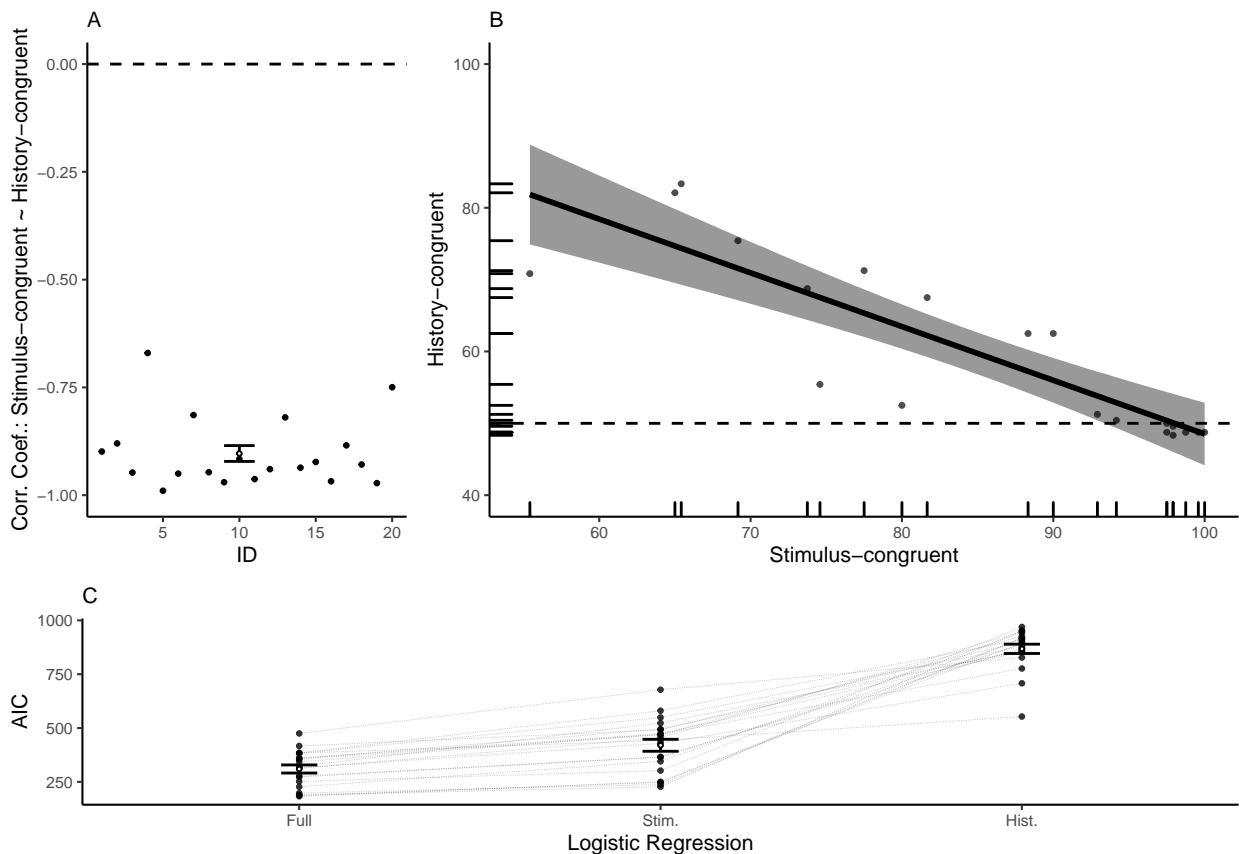

200

201 **Supplementary Figure S2. A. Within-participant correlations of stimulus- and**  
 202 **history-congruent percepts. Related to Figure 1 and 2.** In individual participants,  
 203 Pearson correlation coefficients between the frequencies of stimulus- and history-congruent  
 204 percepts (runs R5-6; fixed SAR) amounted to  $-0.9 \pm 0.02$  ( $T(19) = -49.25$ ,  $p = 1.66 \times 10^{-21}$ ,  
 205  $BF_{10} = 1.34 \times 10^{18}$ , one-sample t-test). This strong inverse relationship suggested that  
 206 perceptual history and disambiguating sensory information compete with each other to  
 207 determine conscious experience. **B. Across-participants correlation of stimulus- and**  
 208 **history-congruent percepts.** Inter-individual differences in the frequency of history-  
 209 congruent percepts strongly predicted the frequency of stimulus-congruent percepts ( $\rho =$   
 210  $-0.77$ ,  $p = 7.2 \times 10^{-5}$ ,  $BF_{10} = 203.27$ , Pearson correlation for runs R5-6). This negative  
 211 association indicated that, overall, perceptual history had a stronger impact in participants  
 212 who were less sensitive to disambiguating sensory information. **C. Predicting perceptual**

213 **responses using logistic regression.** In each participant, the Akaike Information Criterion  
214 (AIC) of logistic regression models based on both disambiguating sensory information and  
215 perceptual history ( $309.95 \pm 18.81$ ) was lower than the AIC for models based on sensory  
216 information only ( $419.95 \pm 27.84$ ;  $T(19) = -9.39$ ,  $p = 1.45 \times 10^{-8}$ ,  $BF_{10} = 8.89 \times 10^5$ ,  
217 paired t-test) or perceptual history only ( $867.86 \pm 21.58$ ;  $T(19) = -16.46$ ,  $p = 1.06 \times 10^{-12}$ ,  
218  $BF_{10} = 6.54 \times 10^9$ ). Pooled data are represented as mean  $\pm$  SEM.

## 2.3 Supplementary Figure S3

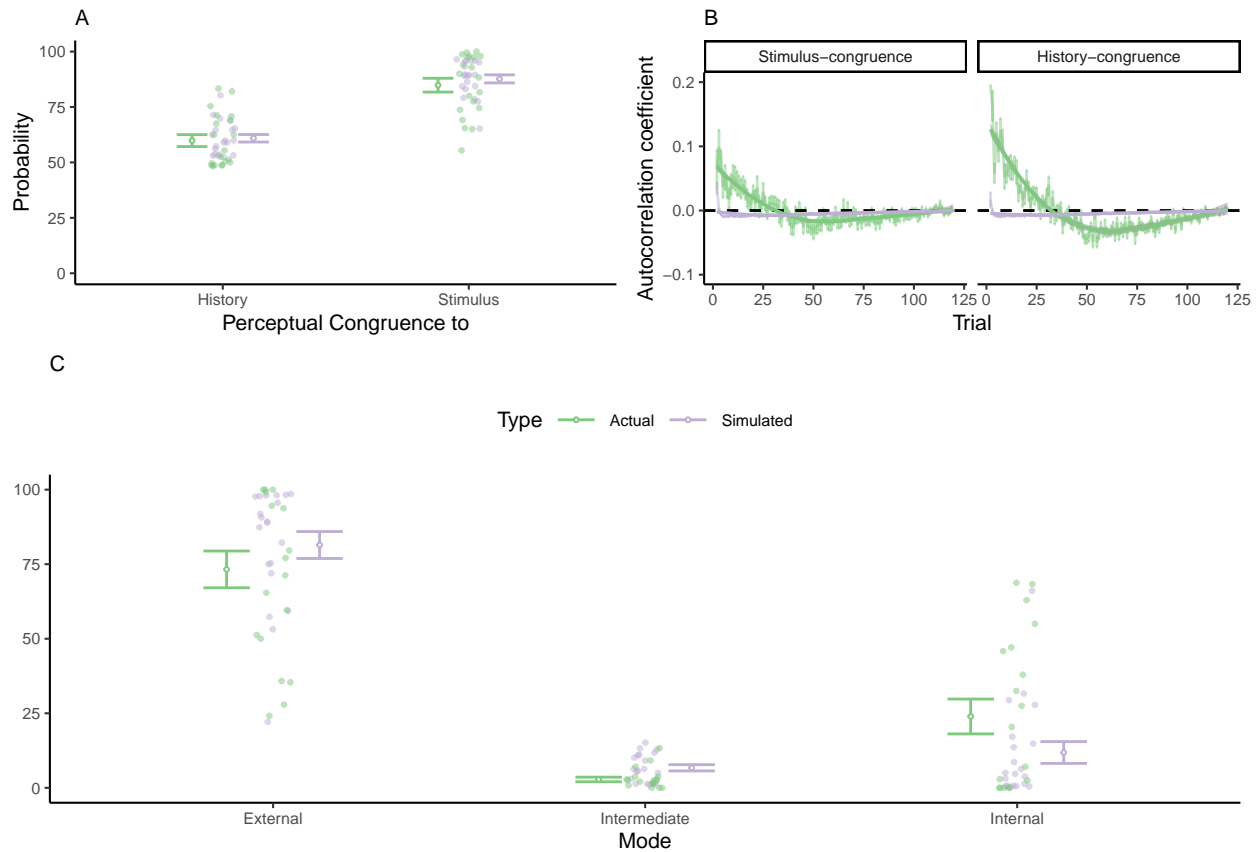

220

221 **Supplementary Figure S3. A. Simulating the overall frequencies of stimulus- and**  
 222 **history-congruent percepts with logistic regression. Related to Figure 1 and 2.**  
 223 We estimated logistic regression models based on both disambiguating sensory information  
 224 and perceptual history in individual participants and used the regression weights to simulate  
 225 perceptual responses. These simulations revealed that logistic regression reproduced the  
 226 overall frequencies of history-congruent percepts observed in the actual experiment (simulated  
 227 data in purple:  $60.9 \pm 1.69\%$ ; actual data in light green:  $59.83 \pm 2.69\%$ ;  $T(19) = 0.78$ ,  $p$   
 228  $= 0.44$ ,  $BF_{10} = 0.31$ , paired t-test) as well as the overall frequency of stimulus-congruent  
 229 percepts (simulated:  $87.69 \pm 1.81\%$ ; actual data:  $84.85 \pm 3.12\%$ ;  $T(19) = 1.48$ ,  $p = 0.16$ ,  
 230  $BF_{10} = 0.59$ ). **B. Simulated autocorrelations of stimulus- and history-congruence.**  
 231 When simulating perceptual responses from logistic regression, we detected no autocorrelation  
 232 of stimulus- or history-congruence. Real trial-wise autocorrelation coefficients are plotted



233 for comparison. **C. Simulating the relative proportions of external, internal and**  
234 **intermediate modes with logistic regression.** Likewise, logistic regression did not  
235 reproduce the relative proportion of trials spent in external mode (simulated:  $81.43 \pm$   
236  $4.52\%$ ; actual:  $73.25 \pm 6.17\%$ ;  $T(19) = 2.75$ ,  $p = 0.01$ ,  $BF_{10} = 4.17$ , paired t-test), internal  
237 mode (simulated:  $11.85 \pm 3.66\%$ ; actual:  $23.94 \pm 5.84\%$ ;  $T(19) = -3.49$ ,  $p = 2.44 \times 10^{-3}$ ,  
238  $BF_{10} = 16.92$ ) and intermediate mode (simulated:  $6.72 \pm 1.05\%$ ; actual:  $2.81 \pm 0.77\%$ ;  $T(19)$   
239  $= 3.73$ ,  $p = 1.41 \times 10^{-3}$ ,  $BF_{10} = 27.07$ ). Pooled data are represented as mean  $\pm$  SEM.

240 **2.4 Supplementary Figure S4**

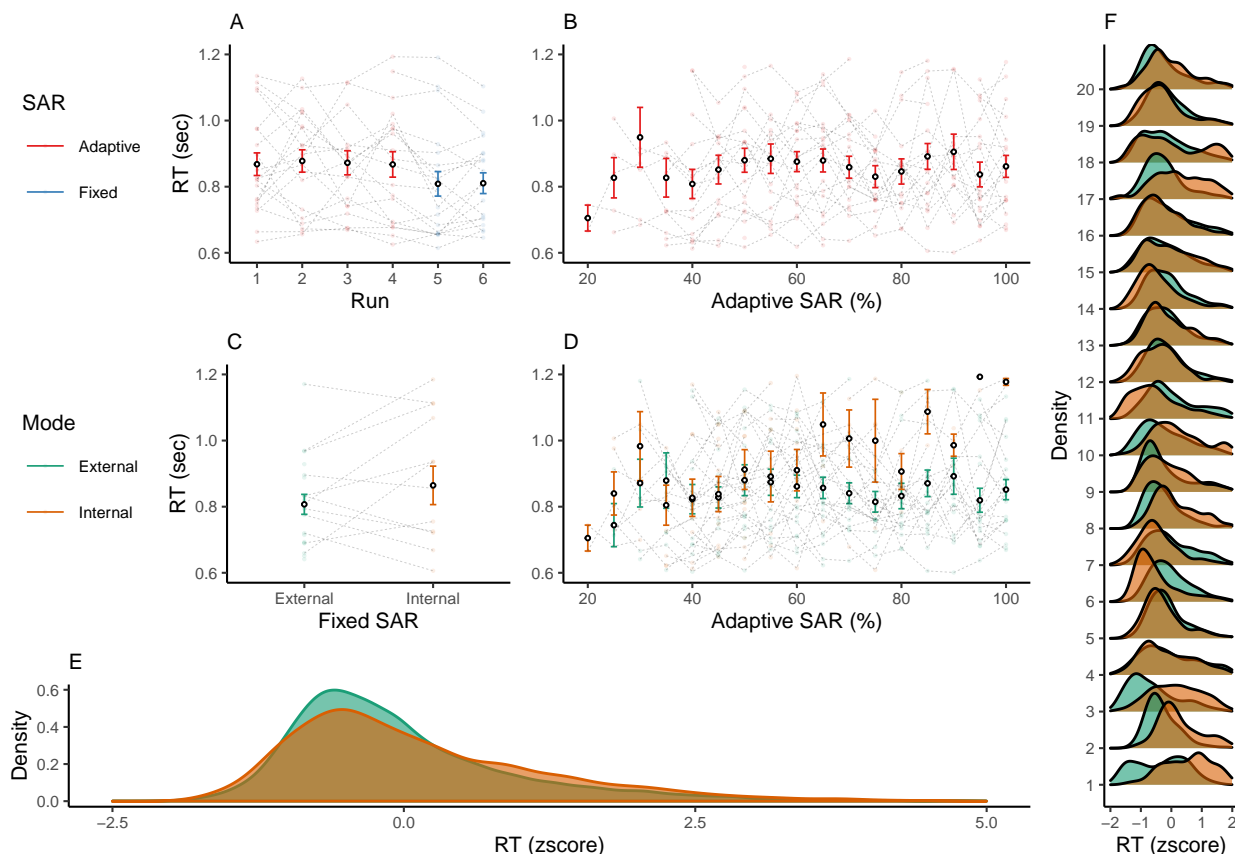

241  
 242 **Supplementary Figure S4. A. RTs across runs.** Related to Figure 1 and 2. In  
 243 runs R1-4 (depicted in red), we adapted the SAR based on a staircase procedure, which did  
 244 not affect RTs (R1:  $0.87 \pm 0.03$  sec; R2:  $0.88 \pm 0.03$  sec; R3:  $0.87 \pm 0.04$  sec; R4:  $0.87 \pm$   
 245  $0.04$  sec). In runs R5-6 (depicted in blue), the SAR was fixed to the average SAR from the  
 246 preceding runs R1-4 ( $60.25 \pm 2.36$  sec). RTs amounted to  $0.81 \pm 0.04$  sec in R5 and  $0.81$   
 247  $\pm 0.03$  sec in R6. **B. RTs across levels of SAR.** Globally, the level of disambiguating  
 248 sensory information did not have a significant effect on RT ( $F(1, 261.5) = 0.05$ ,  $p = 0.82$ ,  
 249  $BF_{10} = 0.15$ , main effect of SAR). **C. RTs during internal and external mode for**  
 250 **SAR at threshold.** In Runs R5 and R6, RTs did not differ between external and internal  
 251 mode ( $T(12) = 0.74$ ,  $p = 0.48$ ,  $BF_{10} = 0.35$ , paired t-test): **D. RTs during internal and**  
 252 **external mode across the full range of SAR.** Linear mixed effects modeling indicated  
 253 that, during internal mode, response times increased significantly for higher levels of SAR

254 ( $F(2, 476.5) = 10.73$ ,  $p = 2.77 \times 10^{-5}$ ,  $BF_{10} = 538.42$ , *mode* x *SAR* interaction), driving a  
255 main effect of *SAR* in this analysis ( $F(1, 488.29) = 21.98$ ,  $p = 3.57 \times 10^{-6}$ ,  $BF_{10} = 1.73$ ).  
256 Response times were longer during internal mode ( $F(2, 474.05) = 5.28$ ,  $p = 5.39 \times 10^{-3}$ ,  
257  $BF_{10} = 18.9$ , main effect of *mode*). **E. Collapsed RTs.** During both internal and external  
258 mode, normalized RTs were better explained by a log-normal distribution (internal mode:  
259  $AIC = 1.07 \times 10^4$ , external mode:  $AIC = 2.79 \times 10^4$ ) as compared to a Gaussian distribution  
260 (internal mode:  $AIC = 1.08 \times 10^4$ , external mode:  $AIC = 2.81 \times 10^4$ ), a gamma distribution  
261 (internal mode:  $AIC = 1.08 \times 10^4$ , external mode:  $AIC = 2.8 \times 10^4$ ) or a Weibull distribution  
262 (internal mode:  $AIC = 1.24 \times 10^4$ , external mode:  $AIC = 3.39 \times 10^4$ ). **F. Individual RT**  
263 **distributions.** Within individual participants (y-axis), the distributions of normalized RTs  
264 were largely overlapping between internal and external mode. Pooled data are represented as  
265 mean  $\pm$  SEM.
